# Supplementary material
Source: PubMed Central journal article supplement (PMC8906395)
Supplement: jvi.01730-21-s0001.pdf [file jvi.01730-21-s0001.pdf]

## **Supplemental Material**

### **Supplemental Materials and Methods**

#### *Assessment of T cell viability*

Cryopreserved PBMCs isolated from HIV negative individuals were thawed and rested overnight as described above. The viability of T cells was repeatedly assessed by using trypan blue staining. Briefly, 10 µl of cell suspension was mixed with 10 µl of 0.4 % trypan blue and loaded onto a cell counting slide. Afterwards, the number of live cells was determined using an automatic cell counter EVE. To determine whether living cells undergo early apoptosis cells were stained repeatedly with Annexin V. Cells were washed with staining buffer (PBS supplemented with 2% FCS) and stained extracellularly for 20 min with fluorescently conjugated antibody: anti-CD3-APC-Cy7 (clone UCHT1; Biolegend). Afterwards, cells were washed with Annexin V Binding Buffer (Biolegend) and stained with anti-AnnexinV-FITC (Biolegend) antibody for 15 min. Subsequently, 400 µl of Annexin V Binding Buffer were added to the cells. Data were collected at FACS Celesta (BD) and analyzed with FlowJo Software version 10.0.7 (TreeStar).

#### *FCS concentration test*

Cryopreserved PBMCs isolated from HIV negative individuals were thawed, rested overnight and on the next day CD8 T cells were isolated using CD8 isolation beads (Miltenyi). Cells were then stimulated with anti-CD3/CD28 beads (Gibco, Life Technologies) at a cell-to-bead ratio of 1:1 in the presence of IL-2 (30 U/ml) (eBioscience) and DMSO or DTG for 3 days. Cells were cultured in R10 media supplemented with 10%, 30% or 50% FCS in humidified atmosphere (5% CO<sub>2</sub>) at 37 °C. Afterwards, the metabolic assay was performed as described above.

# Supplemental Figures

Fig. S1

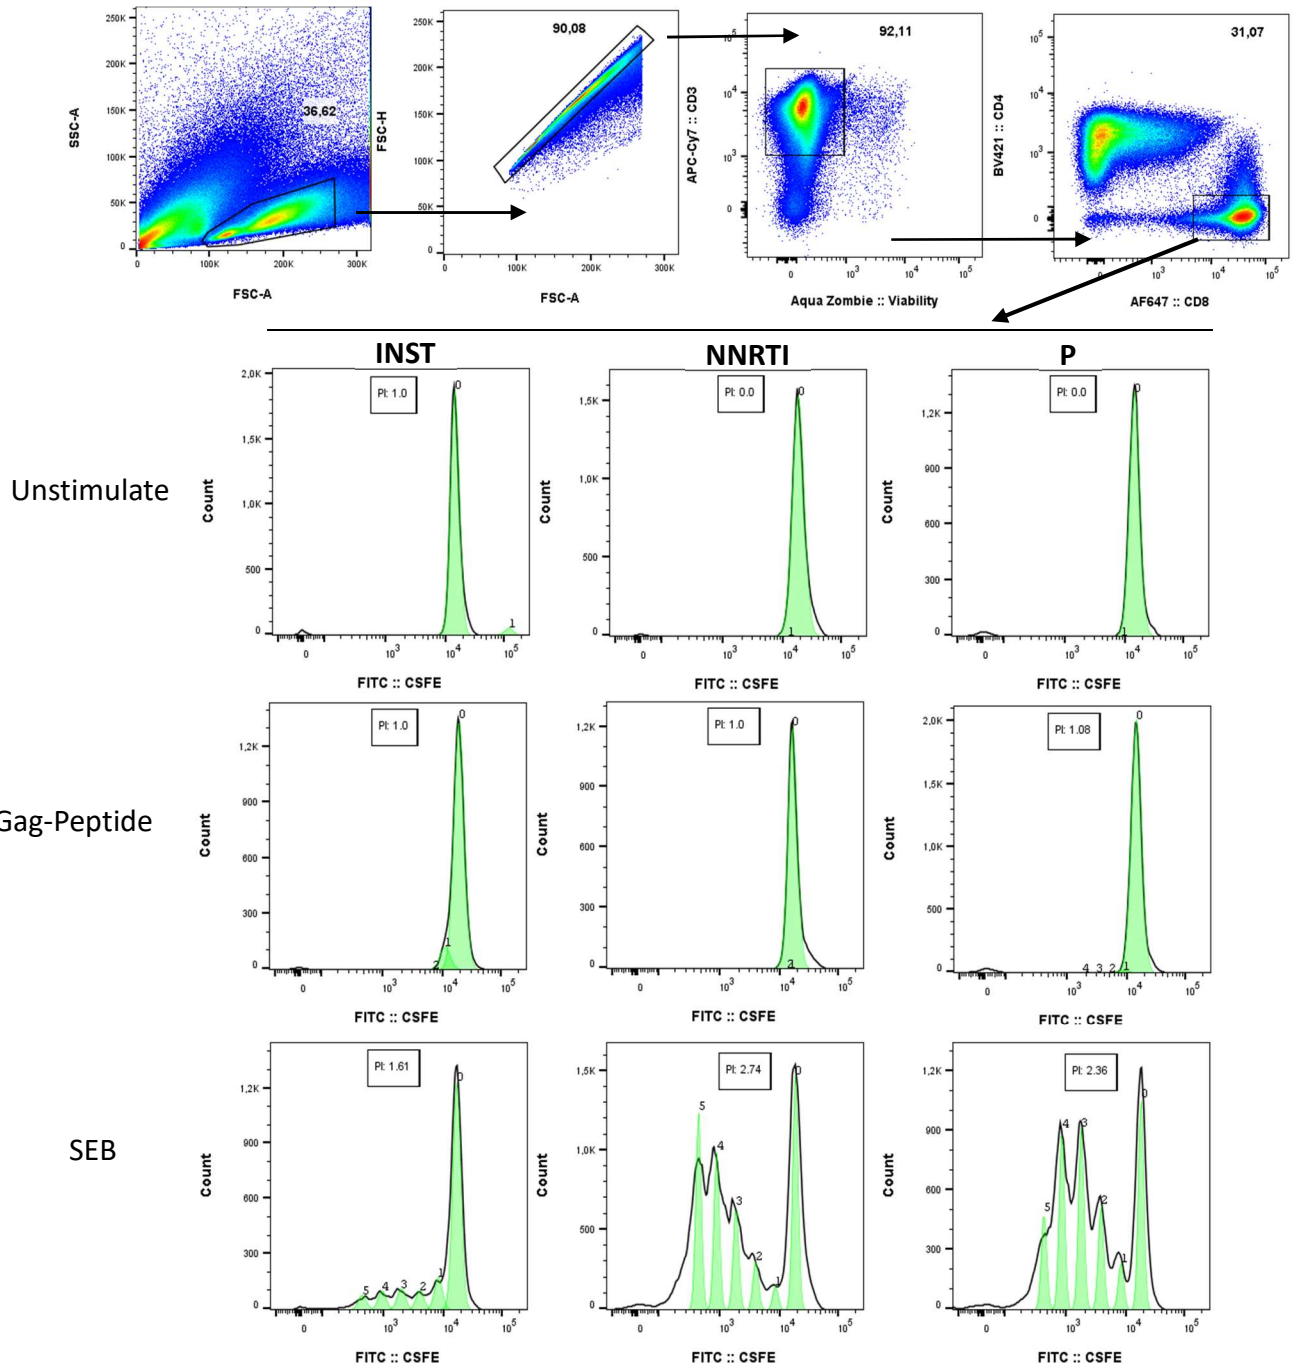

**Figure S1. Representative gating strategy for the assessment of CD8 T cell proliferation from HIV-positive individuals treated with different ART regimen *ex vivo*.** Based on size and granularity, lymphocytes were discriminated using forward and side scatter. Subsequently, lymphocytes were further divided into living CD3 and CD8 T cells. The Proliferation Index was calculated through the FlowJo's Proliferation platform (Version 10) and division was characterized by the reduction in the signal intensity of CSFE.

Fig. S2

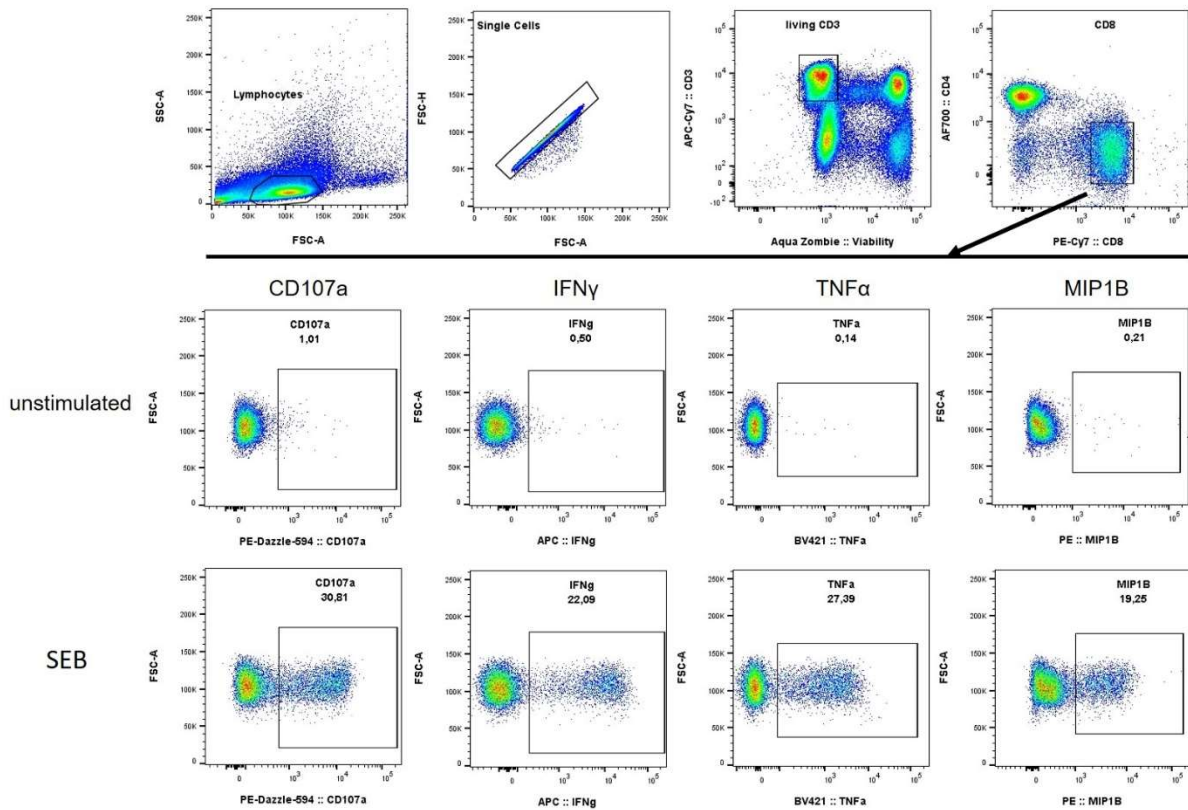

**Figure S2. Representative gating strategy for the assessment of CD8 T cell polyfunction from HIV-positive individuals treated with different ART regimen *ex vivo* (here shown for an individual who received an NNRTI-containing ART regimen). Based on size and granularity, lymphocytes were discriminated using forward and side scatter. Subsequently, lymphocytes were further divided into living CD3 and CD8 T cells and gates for the individual cytokines (CD107a, IFN $\gamma$ , TNF $\alpha$  and MIP1 $\beta$ ) were chosen on the unstimulated control for every sample separately. The frequency of responding cells was calculated by subtracting negative control from the stimulated sample. Afterwards, Boolean gating allowed to analyze polyfunctionality via SPICE Data Analysis.**

Fig. S3

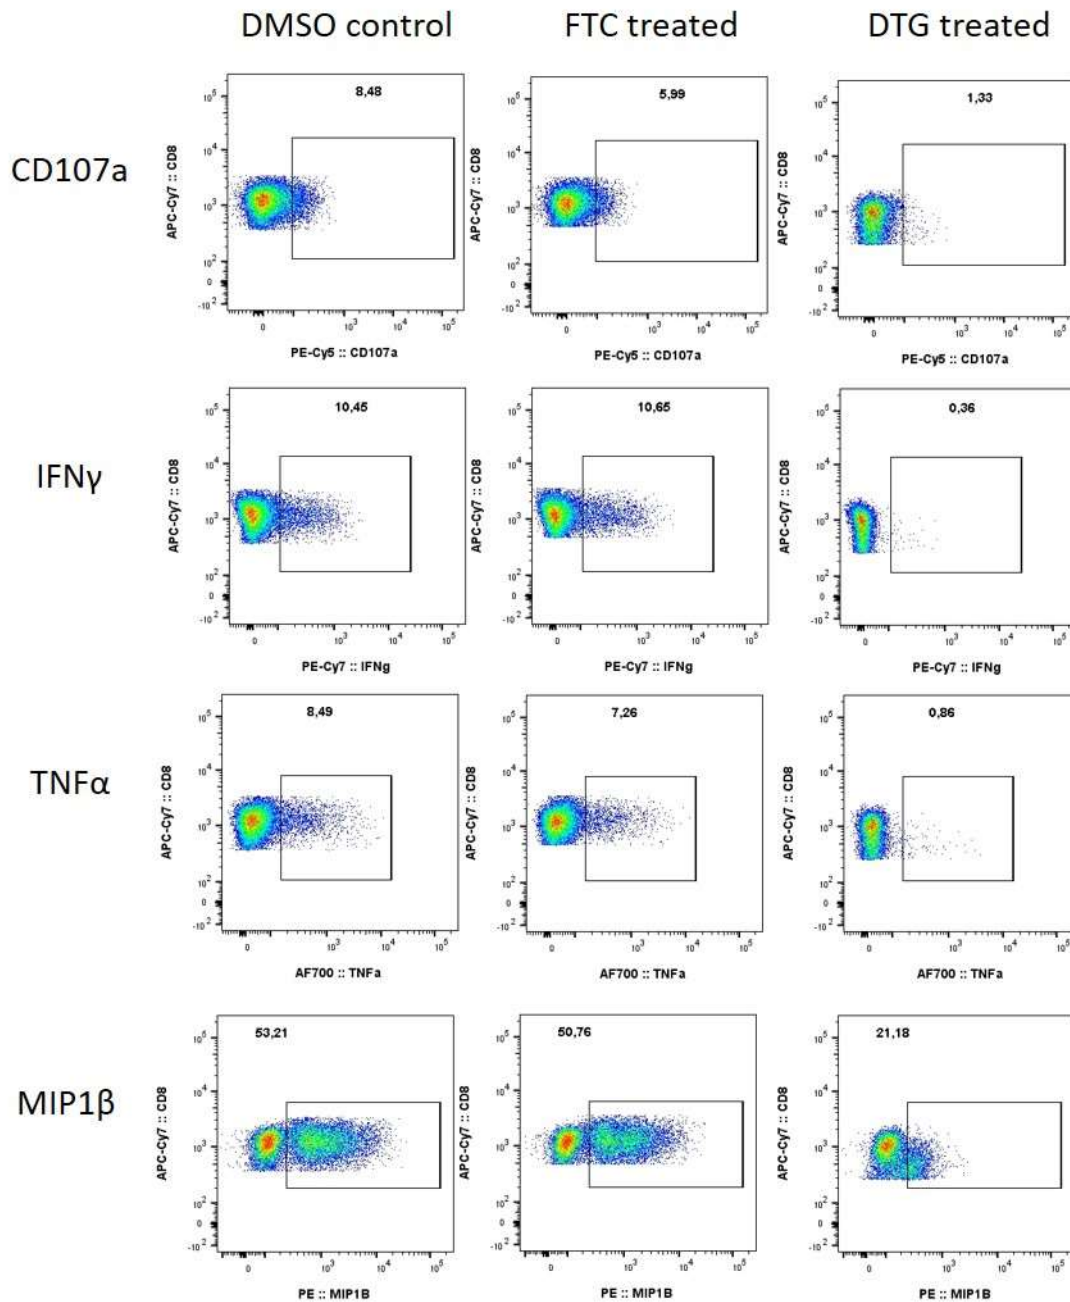

**Figure S3. Representative gating strategy for the assessment of the T cell cytokine expression profile.** Cryopreserved PBMCs isolated from HIV negative individuals and treated with different ART regiments (here shown: DMSO control, emtricitabine and dolutegravir) at described bio-active plasma concentrations for 3 days. Afterwards, cells were stimulated with 5  $\mu$ g/ml SEB for 6h and stained with fluorochrome-conjugated antibodies. Based on size and granularity, lymphocytes were discriminated using forward and side scatter. Subsequently, lymphocytes were further divided into living CD3 and CD8 T cells and gates for the individual cytokines (CD107a, IFN $\gamma$ , TNF $\alpha$  and MIP1 $\beta$ ) were chosen on the unstimulated control for every HIV-negative donor separately. The frequency of responding cells was calculated by subtracting negative control from the stimulated sample.

Fig. S4

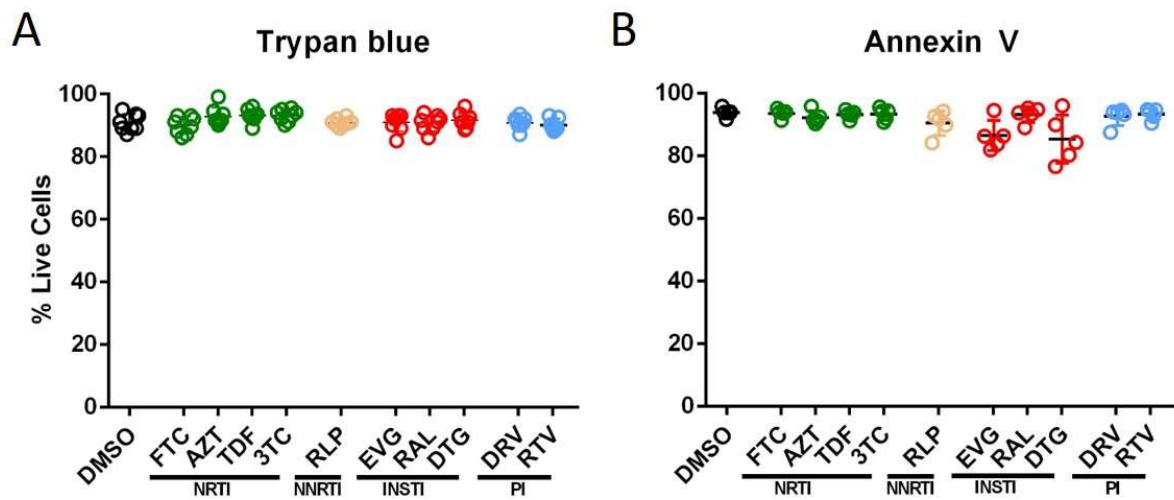

**Figure S4. Assessment of cell viability in the presence of different ART regimens for three days. (A)** Viability assessed of PBMCs by Trypan blue (n=8) and **(B)** by Annexin V (n=5). Plots show individual values with the mean  $\pm$  SD.

Fig S5

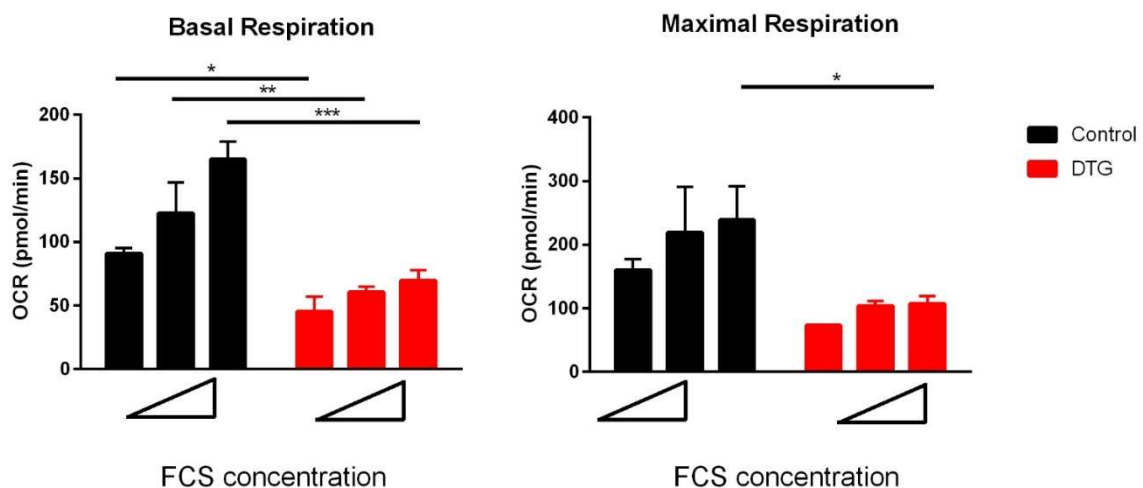

**Figure S5. Impact of increased FCS concentration on respiration.** Increasing FCS concentration (triangles) 10%, 30% and 50% was corresponding to increased basal and maximal respiration in CD8 T cells from HIV positive and treated donor (n=1), which were treated with 1-fold plasma concentration of DTG. Experiment was carried-out in replicates. Charts show the mean value  $\pm$  SEM. Statistical significance was assessed by RM one-way ANOVA test with Holm-Sidak's multiple comparison test. (\*P<0.05; \*\*P<0.01; \*\*\*P<0.01).

# Supplemental Tables

## Table S1

A

### Individuals Ex-Vivo Proliferation

| Demographics             | Overall       | INSTI         | NNRTI         | PI              | P-value |
|--------------------------|---------------|---------------|---------------|-----------------|---------|
| <b>Age</b>               |               |               |               |                 | 0.1469  |
| Mean ± std               | 47.4 ± 12.5   | 47.1 ± 11.3   | 42.8 ± 12.4   | 53.0 ± 13.5     |         |
| <b>Gender</b>            |               |               |               |                 |         |
| Male                     | 42            | 18            | 13            | 11              |         |
| Female                   | 4             | 3             | 0             | 1               |         |
| <b>CD4 count*</b>        |               |               |               |                 | 0.1178  |
| Median                   | 564.1 ± 146.2 | 604.5 ± 145.8 | 512.5 ± 119.7 | 549.3 ± 163.2   |         |
| <b>CD8 count*</b>        |               |               |               |                 | 0.6071  |
| Median                   | 645.7 ± 210.1 | 615.9 ± 187.6 | 663.0 ± 251.7 | 679.2 ± 210.2   |         |
| <b>Days on treatment</b> |               |               |               |                 | 0.007   |
| Mean ± std               | 709.7 ± 696.5 | 392.9 ± 147.9 | 617.6 ± 361.4 | 1363.8 ± 1065.0 |         |

\*at the time the sample was taken

| INSTI   |         | n  |
|---------|---------|----|
| DTG     | ABC+3TC | 11 |
| EVG     | FTC+TAF | 10 |
| total:  |         | 21 |
| NNRTI   |         | n  |
| RLP     | FTC+TAF | 1  |
| RLP     | FTC+TDF | 12 |
| total:  |         | 13 |
| PI      |         | n  |
| RTV+DRV | FTC+TDF | 9  |
| RTV+ATV | FTC+TDF | 2  |
| RTV+ATV | FTC+TAF | 1  |
| total:  |         | 12 |

B

### Individuals Ex-Vivo Polyfunctional

| Demographics             | Overall       | INSTI         | NNRTI         | PI             | P-value |
|--------------------------|---------------|---------------|---------------|----------------|---------|
| <b>Age</b>               |               |               |               |                | 0.0554  |
| Mean ± std               | 46.1 ± 13.9   | 44.9 ± 13.1   | 41.2 ± 12.5   | 54.1 ± 13.7    |         |
| <b>Gender</b>            |               |               |               |                |         |
| Male                     | 34            | 11            | 13            | 10             |         |
| Female                   | 2             | 2             | 0             | 0              |         |
| <b>CD4 count*</b>        |               |               |               |                | 0.219   |
| Median                   | 615.2 ± 209.0 | 708.5 ± 296.3 | 550.9 ± 106.7 | 577.5 ± 132.1  |         |
| <b>CD8 count*</b>        |               |               |               |                | 0.7676  |
| Median                   | 691.3 ± 209.1 | 671.5 ± 249.1 | 727.2 ± 179.9 | 670.5 ± 203.2  |         |
| <b>Days on treatment</b> |               |               |               |                | 0.0036  |
| Mean ± std               | 915.1 ± 690.9 | 588.7 ± 280.6 | 681.7 ± 393.1 | 1642.9 ± 851.0 |         |

\*at the time the sample was taken

| INSTI   |         | n  |
|---------|---------|----|
| DTG     | ABC+3TC | 10 |
| EVG     | FTC+TAF | 3  |
| total:  |         | 13 |
| NNRTI   |         | n  |
| RLP     | FTC+TAF | 3  |
| RLP     | FTC+TDF | 10 |
| total:  |         | 13 |
| PI      |         | n  |
| RTV+DRV | FTC+TDF | 9  |
| LPV     | FTC+TDF | 1  |
| total:  |         | 10 |

**Table S1. List of participants and their regimens in the ex-vivo assays. (A)** Characteristics of individuals (n=46) used in the ex vivo proliferation assay and their individual ART regimens. All participants in this study had two NRTI as a backbone in combination with a third drug from INSTI, NNRTI or PI class listed in the first column. Plus-minus values are means ± SD. **(B)** Characteristics of individuals (n=36) used in the ex vivo polyfunctional assay and their individual ART regimens. All participants in this study had two NRTI as a backbone combined with a third drug from INSTI, NNRTI or PI class listed in first column. Plus-minus values are means ± SD. It should be mentioned that there are overlaps of participants (n=34) where PBMCs were used in both assays, but this was not the case for every participant due to limited access to PBMCs.

**Table S2**

| Antiretroviral       | Abbreviation | Plasma Concentration<br>(ng/ml) |            | Chosen<br>Concentration<br>(ng/ml) | Source                    |
|----------------------|--------------|---------------------------------|------------|------------------------------------|---------------------------|
|                      |              | Median                          | Range      |                                    |                           |
| Emtricitabine        | FTC          | 717                             | 21-1072    | 1000                               | Gish et al., 2002         |
| Zidovudine           | AZT          | 1150                            | 710-1850   | 1500                               | Bergshoeff et al., 2004   |
| Tenofovir DF         | TDF          | 149                             | 120-193    | 200                                | Avihingsanon et al., 2015 |
| Tenofovir            | TFV          | NA*                             | NA*        | 200                                |                           |
| Lamivudine           | 3TC          | 2077                            | 1264-2893  | 1500                               | Bruno et al., 2001        |
| Rilpivirine          | RLP          | 139                             | 128-168    | 200                                | Dickinson et al., 2015    |
| Raltegravir          | RAL          | 448                             | 37-5180    | 1000                               | Yilmaz et al., 2009       |
| Dolutegravir         | DTG          | 3908                            | 3571-4245  | 4000                               | Elliot et al., 2016       |
| Elvitegravir         | EVG          | 1675                            | 1557-1884  | 2000                               | Elliot et al., 2016       |
| Darunavir ethanolate | DRV          | 3930                            | 1800-12900 | 5000                               | Yilmaz et al., 2009       |
| Ritonavir            | RTV          | 746                             | 646-1045   | 1000                               | Boffito et al., 2011      |

\*variable plasma concentrations according to the prodrug

**Table S2.** List of tested ART drugs with previously determined plasma concentration and concentration chosen in the assays

## Supplemental References

1. Gish RG, Leung NW, Wright TL, Trinh H, Lang W, Kessler HA, Fang L, Wang LH, Delehanty J, Rigney A, Mondou E, Snow A, Rousseau F. 2002. Dose range study of pharmacokinetics, safety, and preliminary antiviral activity of emtricitabine in adults with hepatitis B virus infection. *Antimicrob Agents Chemother* 46:1734-40.
2. Bergshoeff AS, Fraaij PL, Verweij C, van Rossum AM, Verweel G, Hartwig NG, de Groot R, Burger DM. 2004. Plasma levels of zidovudine twice daily compared with three times daily in six HIV-1-infected children. *J Antimicrob Chemother* 54:1152-4.
3. Avihingsanon A, Sophonphan J, Thammajaruk N, Chaihong P, Burger D, Cressey TR, Ranautarsing RA, Praditornsilpa K, Avihingsanon Y, Ruxrungtham K. 2015. Plasma Tenofovir Concentrations and Proximal Tubular Dysfunction in HIV-Infected Adults Receiving Tenofovir in Thailand. *J AIDS Clin Res* 6.
4. Bruno R, Regazzi MB, Ciappina V, Villani P, Sacchi P, Montagna M, Panebianco R, Filice G. 2001. Comparison of the plasma pharmacokinetics of lamivudine during twice and once daily administration in patients with HIV. *Clin Pharmacokinet* 40:695-700.
5. Dickinson L, Yapa HM, Jackson A, Moyle G, Else L, Amara A, Khoo S, Back D, Karolia Z, Higgs C, Boffito M. 2015. Plasma Tenofovir, Emtricitabine, and Rilpivirine and Intracellular Tenofovir Diphosphate and Emtricitabine Triphosphate Pharmacokinetics following Drug Intake Cessation. *Antimicrob Agents Chemother* 59:6080-6.
6. Yilmaz A, Gisslén M, Spudich S, Lee E, Jayewardene A, Aweeka F, Price RW. 2009. Raltegravir cerebrospinal fluid concentrations in HIV-1 infection. *PLoS One* 4:e6877.
7. Elliot E, Amara A, Jackson A, Moyle G, Else L, Khoo S, Back D, Owen A, Boffito M. 2016. Dolutegravir and elvitegravir plasma concentrations following cessation of drug intake. *J Antimicrob Chemother* 71:1031-6.

8. Yilmaz A, Izadkhashti A, Price RW, Mallon PW, De Meulder M, Timmerman P, Gisslén M. 2009. Darunavir concentrations in cerebrospinal fluid and blood in HIV-1-infected individuals. *AIDS Res Hum Retroviruses* 25:457-61.
9. Boffito M, Jackson A, Amara A, Back D, Khoo S, Higgs C, Seymour N, Gazzard B, Moyle G. 2011. Pharmacokinetics of once-daily darunavir-ritonavir and atazanavir-ritonavir over 72 hours following drug cessation. *Antimicrob Agents Chemother* 55:4218-23.
